# Supplementary material for: Malignant peritoneal mesotheliomas of rats induced by multiwalled carbon nanotubes and amosite asbestos: transcriptome and epigenetic profiles
Source: PubMed Central journal article supplement (PMC10829475; doi:10.1186/s12989-024-00565-x), 2024-01-31

**A**

Total: 13,383 DEGs

A: Sarcomatoid  
10,649B: Biphasic  
10,602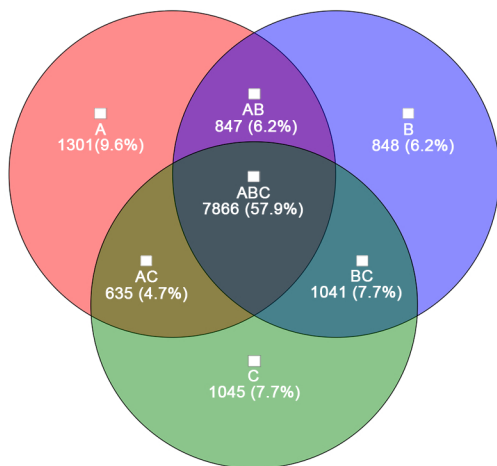C: Epithelioid  
10,587**B**Gene Symbol: Foxm1  
Description: forkhead box M1

1369018\_at

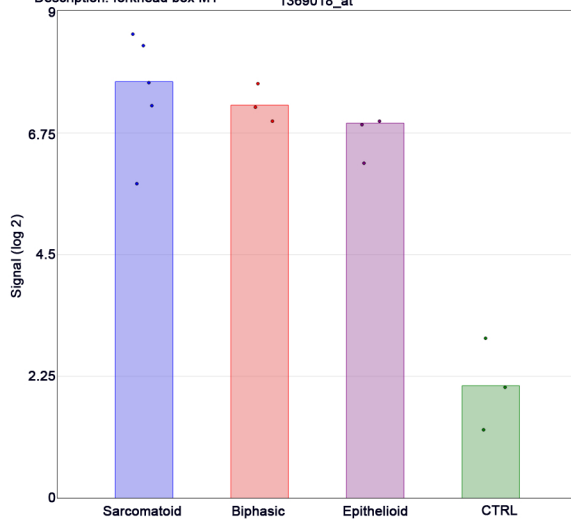**C**Gene Symbol: Msln  
Description: mesothelin

1368441\_at

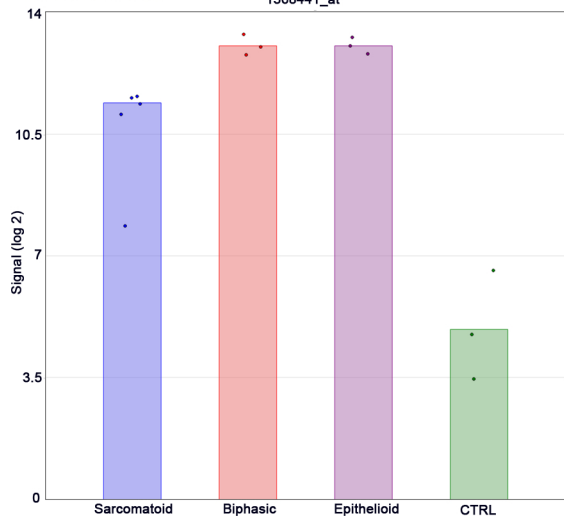**D**Gene Symbol: Spp1  
Description: secreted phosphoprotein 1

1367581\_a\_at

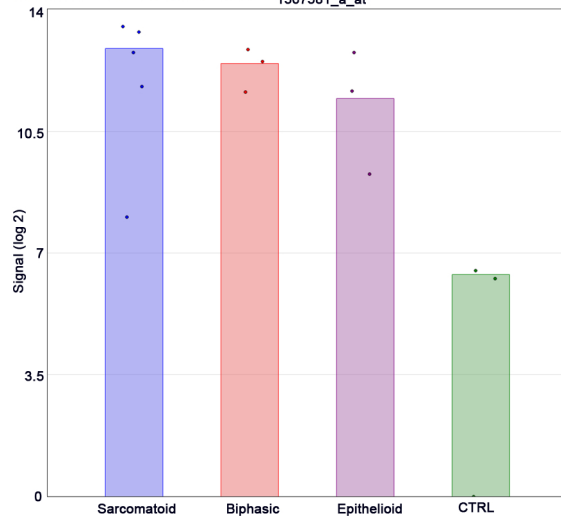

Supplement: 12989_2024_565_MOESM5_ESM.pdf [file 12989_2024_565_MOESM5_ESM.pdf]
