# Supplementary material for: Malignant peritoneal mesotheliomas of rats induced by multiwalled carbon nanotubes and amosite asbestos: transcriptome and epigenetic profiles
Source: PubMed Central journal article supplement (PMC10829475; doi:10.1186/s12989-024-00565-x), 2024-01-31

# A rat mesothelioma

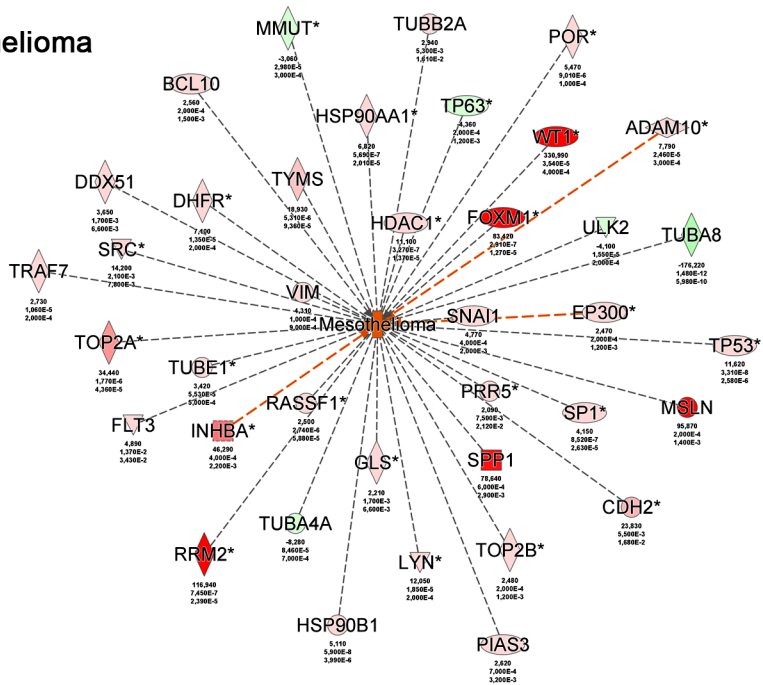

# B human lung tumor (SCLC)

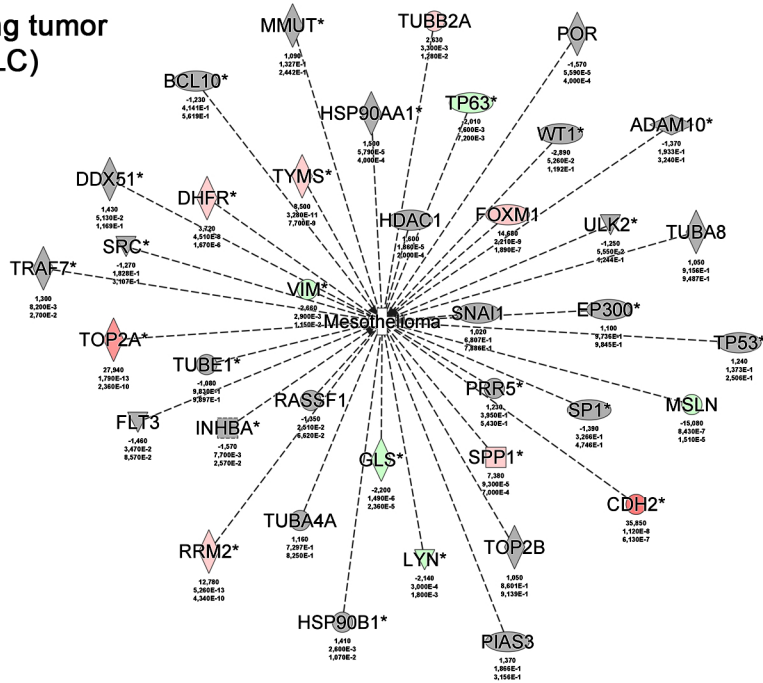

Supplement: 12989_2024_565_MOESM6_ESM.pdf [file 12989_2024_565_MOESM6_ESM.pdf]
